# Supplementary material for: Plexins promote Hedgehog signaling through their cytoplasmic GAP activity
Source: eLife journal article supplement (doi:10.7554/elife.74750), 2022-09-28

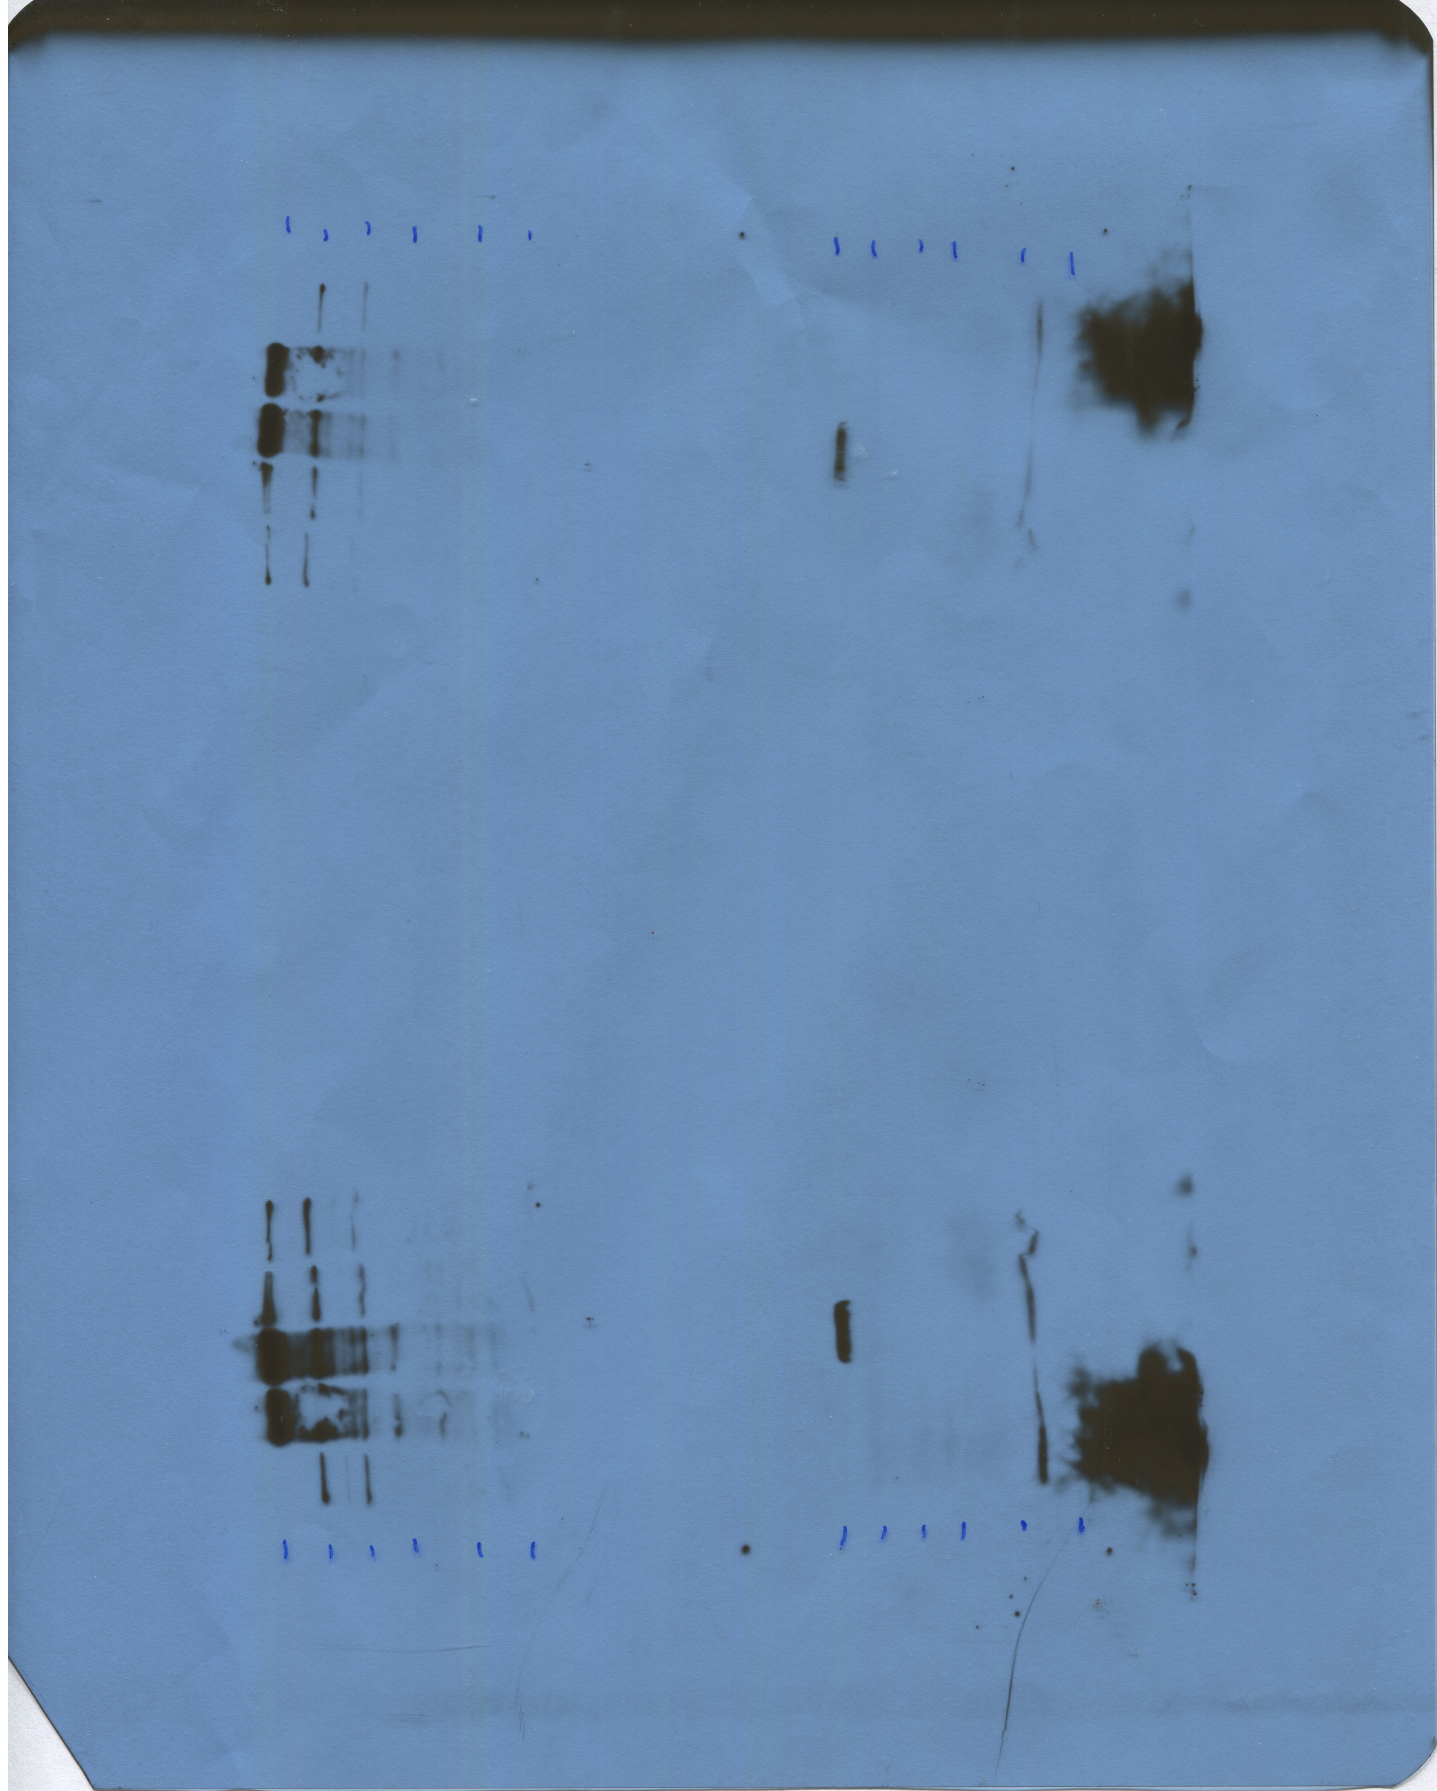

Supplement: fig2-data2 [file elife-74750-fig2-data2-v2.pdf]
