# Supplementary material for: Plexins promote Hedgehog signaling through their cytoplasmic GAP activity
Source: eLife journal article supplement (doi:10.7554/elife.74750), 2022-09-28
Supplement: fig2-data3 [file elife-74750-fig2-data3-v2.pdf]

PCIG, PIXNAH, PIXNAH  $\Delta$  TOLCD, PIXNAH  $\Delta$  CD  
#1-4 supernatant  
5-8 lysates

W2121 & W2125

1 min  
mslg1 & MHC

ህግ

1 1 1 d 1 1  
6
