# Supplementary material for: Plexins promote Hedgehog signaling through their cytoplasmic GAP activity
Source: eLife journal article supplement (doi:10.7554/elife.74750), 2022-09-28

PDS, PIXNA1, PIXNAITMCD, PIXNAIACD  
 Lanes 1-4 : ~~by~~ supernatants  
 5-8 : Lysates (3T3)  
 MS1961 &  $\beta$ -tub

5 sec ~~10 sec~~  
 250 -  
 150 -  
 100 -  
 75 -  
 50 -  
 40 -  
 30 -  
 20 -

1 1 1 1 1  
 1 1 1 1 1

9/21/17

325C 5.81M17

NIMS

5.81M17

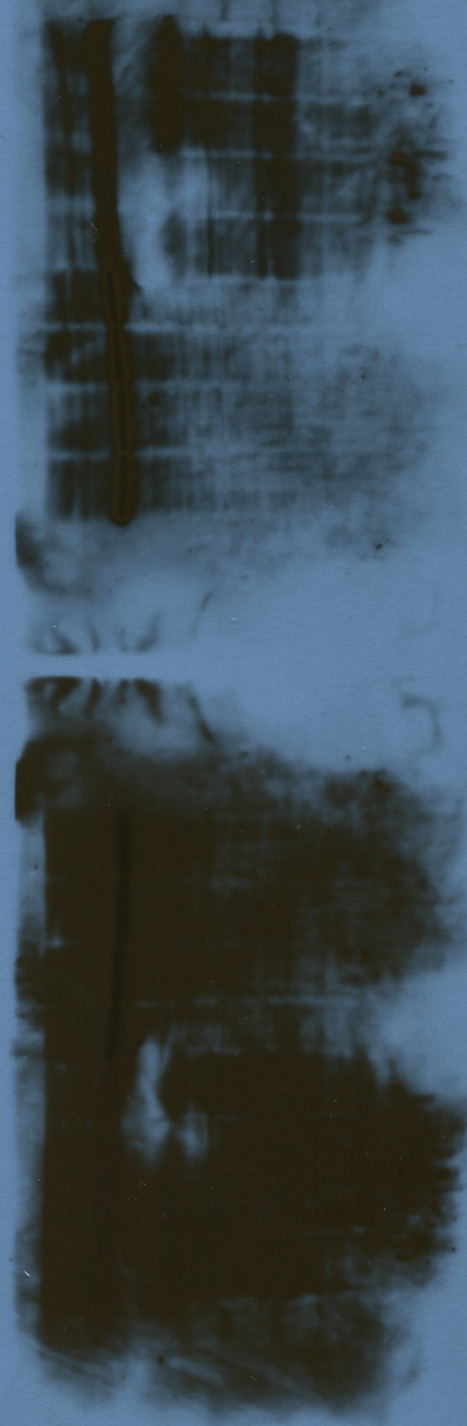

Supplement: fig2-data4 [file elife-74750-fig2-data4-v2.pdf]
