# Supplementary material for: Plexins promote Hedgehog signaling through their cytoplasmic GAP activity
Source: eLife journal article supplement (doi:10.7554/elife.74750), 2022-09-28

pCIG  
MYC::PLXNA1  
MYC::PLXNA1 $\Delta$ TMCD  
MYC::PLXNA1 $\Delta$ CD

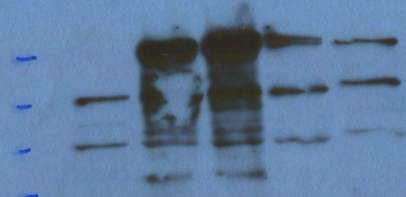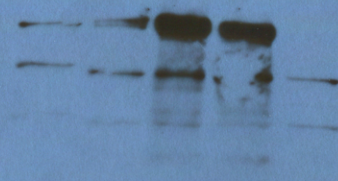

Supplement: fig2-data5 [file elife-74750-fig2-data5-v2.pdf]
