# Supplementary material for: Plexins promote Hedgehog signaling through their cytoplasmic GAP activity
Source: eLife journal article supplement (doi:10.7554/elife.74750), 2022-09-28
Supplement: fig2-data6 [file elife-74750-fig2-data6-v2.pdf]

1 min  
mslg1  $\alpha$  Myc

pClG, PIXnA1, PIXnA1  $\Delta$ TMCD, PIXnA1  $\Delta$ CD  
 #1-4 supernatant  
 5-8 lysates

bCIG

MYC::PLXNA1

MYC::PLXNA1

MYC::PLXNA1

5 min  
α wfc

9/22/17
