# Supplementary material for: Plexins promote Hedgehog signaling through their cytoplasmic GAP activity
Source: eLife journal article supplement (doi:10.7554/elife.74750), 2022-09-28
Supplement: fig2-data7 [file elife-74750-fig2-data7-v2.pdf]

pCIG, PLXNA1, PLXNA1<sup>TMCD</sup>, PLXNA1<sup>ACD</sup>  
 Lanes 1-4: ~~lys~~ supernatants  
 5-8: Lysates (3T3)  
 mAb IgG1  $\alpha$   $\beta$ -tub

9/21/17

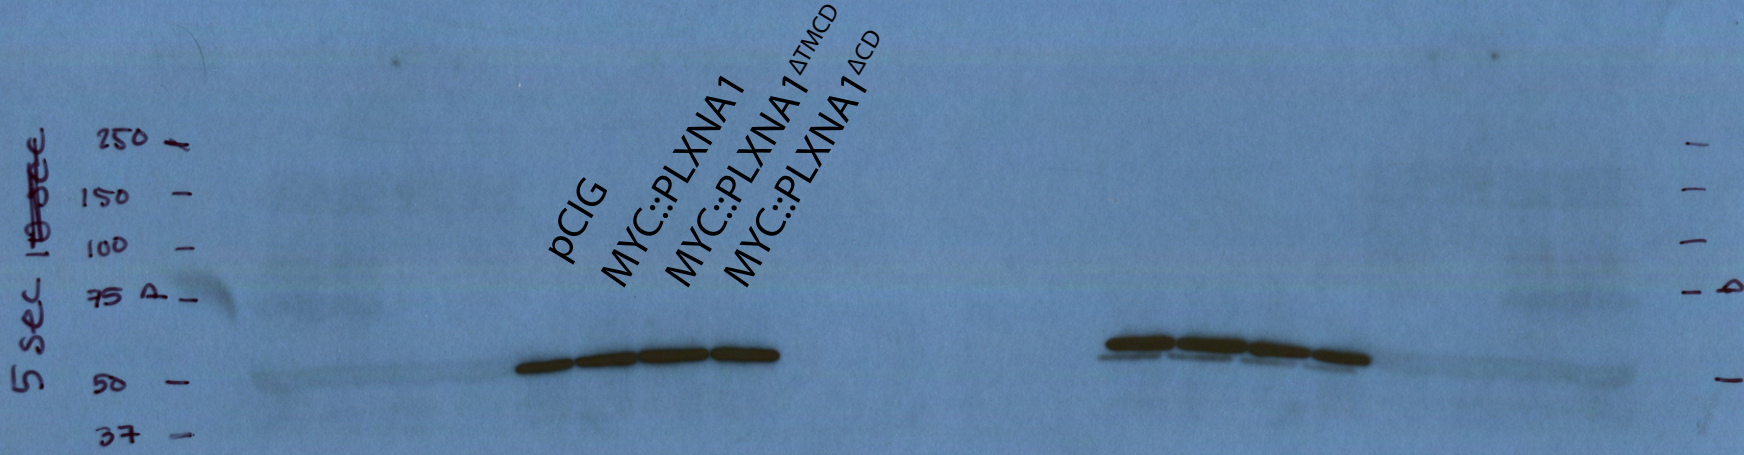

SWIN

Chambers 2326

Lyso
