# Supplementary material for: Plexins promote Hedgehog signaling through their cytoplasmic GAP activity
Source: eLife. 2022 Sep 28;11:e74750. doi: 10.7554/eLife.74750 (PMC9553217; doi:10.7554/eLife.74750)
Supplement: Figure 1—source data 1. [file elife-74750-fig1-data1.xlsx]

## Sheet: 1B
Treatment	Luciferase	Bgal
pCIG	32.871	23727.2
pCIG	52.594	25768.3
pCIG	29.584	26469
pCIG + SHH	305.701	21283.3
pCIG + SHH	243.246	24196.2
pCIG + SHH	210.375	23823.2
PlxnA1	19.723	10272.6
PlxnA1	32.871	10176.3
PlxnA1	9.861	11509
PlxnA1 + SHH	259.682	11449
PlxnA1 + SHH	282.692	10432.8
PlxnA1 + SHH	230.098	12620.5

## Sheet: 1C
Treatment	Luciferase	Bgal
pCIG	35.83	33100.9
pCIG	9.772	39674.4
pCIG	9.772	43998.6
pCIG + NSHH	387.618	69989
pCIG + NSHH	387.618	68342
pCIG + NSHH	397.39	79569.4
A2	13.029	33861.9
A2	22.801	33507.1
A2	13.029	35237.6
A2 + NSHH	469.051	54566.6
A2 + NSHH	690.547	58591.6
A2 + NSHH	478.823	66096.6

## Sheet: 1D
Treatment	Luciferase	Bgal
pCIG	28.507	44357.7
pCIG	41.176	36355.8
pCIG	34.841	40845.9
pCIG +NSHH	497.281	45342.2
pCIG +NSHH	418.096	43659.1
pCIG +NSHH	604.972	45115.9
PlxnA3	31.674	21273.5
PlxnA3	15.837	19877.9
PlxnA3	22.172	20145.4
PlxnA3 +NSHH	627.144	24571.5
PlxnA3 +NSHH	614.474	26005.7
PlxnA3 +NSHH	497.281	28715.3

## Sheet: 1E
Treatment	Luciferase	Bgal
pCIG	28.507	44357.7
pCIG	41.176	36355.8
pCIG	34.841	40845.9
pCIG +NSHH	497.281	45342.2
pCIG +NSHH	418.096	43659.1
pCIG +NSHH	604.972	45115.9
PlxnA4	19.004	17251.3
PlxnA4	12.67	13860.9
PlxnA4	6.335	22813.7
PlxnA4 +NSHH	595.47	18119.6
PlxnA4 +NSHH	570.131	22356.3
PlxnA4 +NSHH	500.448	22039

## Sheet: 1F
Treatment	Luciferase	Bgal
pCIG	23.332	19772.9
pCIG	33.331	22394.2
pCIG	79.995	19384.9
pCIG + SHH	536.631	25401.2
pCIG + SHH	616.626	28075.4
pCIG + SHH	679.955	23165.7
PlxnB2	9.999	6376.28
PlxnB2	6.666	6063.88
PlxnB2	23.332	6246.55
PlxnB2 + SHH	513.299	9532.25
PlxnB2 + SHH	686.621	9452.48
PlxnB2 + SHH	509.966	9134.61

## Sheet: 1G
Treatment	Luciferase	Bgal
pCIG	25.827	25312
pCIG	22.599	26987.9
pCIG	16.142	26006.2
pCIG + NSHH	497.17	30091.4
pCIG + NSHH	519.768	16564.5
pCIG + NSHH	332.523	18236.7
PlxnA1	19.37	15032.6
PlxnA1	19.37	18821.7
PlxnA1	19.37	17771.8
PlxnA1 + NSHH	845.834	15486.5
PlxnA1 + NSHH	710.243	16989
PlxnA1 + NSHH	778.039	19988
PlxnB2	9.685	11805.5
PlxnB2	16.142	7059.67
PlxnB2	19.37	9851.6
PlxnB2 + NSHH	542.367	10643.8
PlxnB2 + NSHH	558.509	9773.94
PlxnB2 + NSHH	500.398	13302.6
Gfralpha	19.37	12757.2
Gfralpha	16.142	18537.7
Gfralpha	9.685	12793.3
Gfralpha + NSHH	481.028	18047
Gfralpha + NSHH	519.768	18401.6
Gfralpha + NSHH	484.256	19420.7

## Sheet: 1H
Sample	Target	CT
bi	cyclo	23.5061
bi	gli1	32.771
bi	gli1	32.771
bi	gli1	32.771
bi sag	cyclo	23.2915
bi sag	gli1	28.5745
bi sag	gli1	28.5176
bi sag	gli1	28.5008
nrps	cyclo	22.7327
nrps	gli1	33.8949
nrps	gli1	33.4346
nrps	gli1	33.722
nrps sag	cyclo	22.9922
nrps sag	gli1	31.549
nrps sag	gli1	31.6139
nrps sag	gli1	31.503
plxns	cyclo	22.9786
plxns	gli1	31.6139
plxns	gli1	31.7759
plxns	gli1	31.8013
plxns sag	cyclo	22.9398
plxns sag	gli1	29.8281
plxns sag	gli1	29.6003
plxns sag	gli1	29.8043

## Sheet: 1I
Sample	Target	CT
bi	cyclo	23.5061
bi	ptch1	31.2306
bi	ptch1	31.2306
bi	ptch1	31.2306
bi sag	cyclo	23.2915
bi sag	ptch1	28.4431
bi sag	ptch1	28.4164
bi sag	ptch1	28.3595
nrps	cyclo	22.7327
nrps	ptch1	31.7743
nrps	ptch1	32.1401
nrps	ptch1	31.9043
nrps sag	cyclo	22.9922
nrps sag	ptch1	31.3885
nrps sag	ptch1	31.414
nrps sag	ptch1	31.5579
plxns	cyclo	22.9786
plxns	ptch1	31.5987
plxns	ptch1	31.6563
plxns	ptch1	31.7965
plxns sag	cyclo	22.9398
plxns sag	ptch1	29.9675
plxns sag	ptch1	29.9817
plxns sag	ptch1	30.1949
