# Supplementary material for: Plexins promote Hedgehog signaling through their cytoplasmic GAP activity
Source: eLife. 2022 Sep 28;11:e74750. doi: 10.7554/eLife.74750 (PMC9553217; doi:10.7554/eLife.74750)
Supplement: Figure 2—source data 1. [file elife-74750-fig2-data1.xlsx]

## Sheet: 2B
Treatment	Luciferase	Bgal
pCIG	2806.36	9923.72
pCIG	3217.48	10717.5
pCIG	4567.96	8569.55
pCIG + NSHH	20136.6	13157.3
pCIG + NSHH	21816.9	12151.4
pCIG + NSHH	19166.9	13569.9
PlxnA1	1212.07	4240.36
PlxnA1	939.041	4150.47
PlxnA1	2339.25	4872.2
PlxnA1 + NSHH	18130.1	5872.82
PlxnA1 + NSHH	15603.2	6081.73
PlxnA1 + NSHH	20375.1	6037.28
PlxnA1dTMCD	2160.21	7754.08
PlxnA1dTMCD	2970.41	10427.3
PlxnA1dTMCD	1936.17	8958.41
PlxnA1dTMCD + NSHH	18756.2	12912
PlxnA1dTMCD + NSHH	20928.1	11001.2
PlxnA1dTMCD + NSHH	22937.2	14710.8
PlxnA1dCD	1510.1	5922.82
PlxnA1dCD	3811.67	8079.88
PlxnA1dCD	4122.78	7507.76
PlxnA1dCD + NSHH	19004.6	14282.6
PlxnA1dCD + NSHH	21125.5	10793.7
PlxnA1dCD + NSHH	20594.5	12330.1
