# Supplementary material for: Plexins promote Hedgehog signaling through their cytoplasmic GAP activity
Source: eLife. 2022 Sep 28;11:e74750. doi: 10.7554/eLife.74750 (PMC9553217; doi:10.7554/eLife.74750)
Supplement: Figure 3—figure supplement 1—source data 1. [file elife-74750-fig3-figsupp1-data1.xlsx]

## Sheet: S2C
Treatment	Luciferase	Bgal
pCIG	19.419	19929.5
pCIG	67.966	16810
pCIG	42.074	16029.3
pCIG + SHH	679.658	21681.9
pCIG + SHH	608.456	22045.2
pCIG + SHH	708.786	25404.2
PlxnB2	38.838	5681.8
PlxnB2	12.946	5180.33
PlxnB2	9.709	6956.81
PlxnB2 + SHH	423.977	8583.47
PlxnB2 + SHH	517.835	8610.5
PlxnB2 + SHH	420.741	9125.93
PlxnB2R1	35.601	10173.8
PlxnB2R1	12.946	11525.5
PlxnB2R1	32.365	10373.3
PlxnB2R1 + SHH	495.18	16767.1
PlxnB2R1 + SHH	440.16	15626.7
PlxnB2R1 + SHH	559.909	15521.9
