# Supplementary material for: Plexins promote Hedgehog signaling through their cytoplasmic GAP activity
Source: eLife. 2022 Sep 28;11:e74750. doi: 10.7554/eLife.74750 (PMC9553217; doi:10.7554/eLife.74750)
Supplement: Figure 3—figure supplement 2—source data 1. [file elife-74750-fig3-figsupp2-data1.xlsx]

## Sheet: S3B
	Bgal		Luc
	23822.5		49.367	0.00207228	0.00306896	0.675239
pCIG	28892.3		93.538	0.00323747		1.05491	1
	24001.8		93.538	0.00389713		1.26985
	10050.5		719.724	0.0716105		23.3338
SmoM2	10770.1		826.253	0.0767176		24.9979	25.4386
	9439.23		810.664	0.0858824		27.9842
	3742.88		1086.08	0.290173		94.5509
SmoM2+A1∆ECD	3329.26		1543.38	0.46358		151.054	123.787
	4046.1		1561.57	0.385944		125.757
	6544.15		1005.53	0.153654		50.0672
SmoM2+A1R1∆ECD	5066.84		930.185	0.183583		59.8192	50.0789
	6294.61		779.484	0.123833		40.3503
	3787.61		1223.79	0.323104		105.281
SmoM2+A1Y1∆ECD	3067		870.424	0.283803		92.4754	102.785
	3176.87		1078.29	0.339418		110.597
	6594.76		893.809	0.135533		44.1626
SmoM2+A1R1Y1∆ECD	7436.9		976.954	0.131366		42.8047	46.0801
	6456.3		1015.93	0.157354		51.2729
	7230.96		761.296	0.105283		34.3057
SmoM2+A1Y2∆ECD	4887.15		766.493	0.156839		51.1048	36.7407
	9213.11		701.536	0.0761454		24.8115
	8451.67		657.365	0.0777793		25.3439
SmoM2+A1R1Y2∆ECD	6783.78		732.715	0.10801		35.1943	29.0643
	6670.2		545.639	0.0818025		26.6548

## Sheet: S3C
	Bgal		Luc
	35770		51.966	0.00145278	0.00237417	0.611911
pCIG	38957.8		103.931	0.00266778		1.12367	1
	37217.9		111.726	0.00300194		1.26442
	10428.9		841.843	0.0807218		34
SmoM2	9524.85		802.869	0.084292		35.5038	32.8078
	10368.9		711.929	0.0686601		28.9196
	2464.87		12.991	0.00527045		2.21992
A1∆ECD	2768.35		7.795	0.00281575		1.186	1.95827
	2659.69		15.59	0.00586159		2.4689
	3130.13		1101.67	0.351956		148.244
A1∆ECD+SmoM2	3129.08		1091.28	0.348754		146.895	145.563
	3046.25		1023.72	0.33606		141.548
	4743.69		10.393	0.00219091		0.922812
A1R1∆ECD	7589.23		25.983	0.00342367		1.44205	1.1307
	7457.61		18.188	0.00243885		1.02724
	6488.21		896.407	0.138159		58.1927
A1R1∆ECD+SmoM2	5495.38		873.022	0.158865		66.9139	59.064
	6198.42		766.493	0.123659		52.0853
	6778.17		20.786	0.00306661		1.29166
A1R1R2∆ECD	8839.18		28.581	0.00323344		1.36193	1.20876
	10126.1		23.385	0.00230938		0.972711
	6433.48		922.39	0.143373		60.3889
A1R1R2∆ECD+SmoM2	5244.07		592.408	0.112967		47.5818	57.838
	4658.55		724.92	0.155611		65.5432
