# Supplementary material for: Plexins promote Hedgehog signaling through their cytoplasmic GAP activity
Source: eLife. 2022 Sep 28;11:e74750. doi: 10.7554/eLife.74750 (PMC9553217; doi:10.7554/eLife.74750)
Supplement: Figure 3—figure supplement 3—source data 1. [file elife-74750-fig3-figsupp3-data1.xlsx]

## Sheet: B
	Bgal		Luc
	2336.08		300.19	0.128501	0.11509	1.11653
pCIG	2202.13		258.424	0.117352		1.01965	1
	2205.53		219.269	0.0994179		0.863824
	3560.94		1970.81	0.553452		4.80884
Chir	2759.8		2902.7	1.05178		9.13874	6.99832
	2416.97		1960.37	0.811085		7.04737
	2410.17		736.117	0.305422		2.65375
A1-FL	2486.79		1519.22	0.610917		5.30814	4.02389
	2168.86		1025.87	0.472997		4.10979
	2262.03		759.61	0.33581		2.91779
A1∆ECD	2309.89		433.317	0.187592		1.62995	1.79797
	2171.12		211.438	0.0973864		0.846173

## Sheet: C
	Bgal		Luc
	2127.24		143.294	0.0673613	0.114546	0.588071
pCIG	1818.24		171.953	0.094571		0.825614	1
	1433.82		260.534	0.181706		1.58632
	1537		2003.51	1.30352		11.3799
B-cat	1640.07		2717.37	1.65687		14.4646	13.0197
	1648.89		2495.92	1.5137		13.2147
	1758.1		940.529	0.53497		4.67034
B-cat+A1	2119.18		849.342	0.400787		3.49891	4.08444
	1926.94		901.449	0.467814		4.08406
	1695.5		153.715	0.0906605		0.791475
B-cat+A1∆ECD	1751.59		205.822	0.117506		1.02584	1.2563
	1853.08		414.25	0.223547		1.95158
