# Supplementary material for: Plexins promote Hedgehog signaling through their cytoplasmic GAP activity
Source: eLife. 2022 Sep 28;11:e74750. doi: 10.7554/eLife.74750 (PMC9553217; doi:10.7554/eLife.74750)
Supplement: Figure 3—source data 1. [file elife-74750-fig3-data1.xlsx]

## Sheet: 3B
Treatment	Luciferase	Bgal
pCIG	68.693	29215.5
pCIG	22.898	17804.6
pCIG	39.253	23655.9
pCIG + SHH	647.678	31521.4
pCIG + SHH	745.811	33139.4
pCIG + SHH	1131.8	36655.4
PlxnA1	26.169	14803
PlxnA1	32.711	16706.6
PlxnA1	19.627	16272.8
PlxnA1 + SHH	860.3	23662.7
PlxnA1 + SHH	909.366	23907.2
PlxnA1 + SHH	1256.1	22354.6
PlxnA1dECD	22.898	2001.15
PlxnA1dECD	29.44	1892.28
PlxnA1dECD	3.271	2149.62
PlxnA1dECD + SHH	932.264	3389.91
PlxnA1dECD + SHH	886.469	3391.08
PlxnA1dECD + SHH	1059.84	4520.06
PlxnA1dCD	39.253	21239.3
PlxnA1dCD	29.44	17590.9
PlxnA1dCD	39.253	22611.3
PlxndCD + SHH	827.589	31986.1
PlxndCD + SHH	742.54	28680.9
PlxndCD + SHH	1481.81	29546.9

## Sheet: 3C
Treatment	Luciferase	Bgal
UT	36.899	29292.8
UT	50.736	26982.1
UT	66.879	31288.2
UT NSHH-CM	516.585	35762.1
UT NSHH-CM	422.031	39274
UT NSHH-CM	445.093	34616.3
PlxnA1	9.225	7087.69
PlxnA1	13.837	7743.1
PlxnA1	11.531	8045.47
PlxnA1 NSHH-CM	285.966	8863.88
PlxnA1 NSHH-CM	309.028	11123.3
PlxnA1 NSHH-CM	385.132	10553.6
PlxnA1R1	27.674	26788.3
PlxnA1R1	39.205	34877.3
PlxnA1R1	23.062	32936.7
PlxnA1R1 NSHH-CM	664.18	41334.2
PlxnA1R1 NSHH-CM	516.585	44825.1
PlxnA1R1 NSHH-CM	530.422	43015.3

## Sheet: 3D
Treatment	Luciferase	Bgal
pCIG	39.262	20143
pCIG	42.534	23429
pCIG	32.718	20538.8
pCIG + NSHH	1024.08	29712.9
pCIG + NSHH	1024.08	28155.3
pCIG + NSHH	1125.5	39968.4
A1dECD	16.359	2044.25
A1dECD	6.544	2124.34
A1dECD	16.359	2218.65
A1dECD + NSHH	598.742	2695.57
A1dECD + NSHH	939.01	2824.78
A1dECD + NSHH	615.101	2932.39
A1dECDR1	13.087	6874.22
A1dECDR1	3.272	6085.04
A1dECDR1	9.815	6762.79
A1dECDR1 + NSHH	1168.04	9451.42
A1dECDR1 + NSHH	850.672	9995.66
A1dECDR1 + NSHH	1004.45	9504.46
A1dCD	16.359	11927.5
A1dCD	19.631	16482.9
A1dCD	35.99	20098
A1dCD + NSHH	1010.99	27016.2
A1dCD + NSHH	1433.05	27424.9
A1dCD + NSHH	1115.69	30718.8

## Sheet: 3O
Treatment	Luciferase	Bgal
	20.123	21940
pCIG	27.669	22464.4
	32.7	22629.7
	7.546	2178.36
PlxnA1dECD	7.546	2508.28
	10.062	2568.4
	140.862	9294.25
SmoM2	206.262	10678.1
	208.777	8121.23
	251.538	2602.91
SmoM2+PlxnA1dECD	196.2	2681.57
	186.138	3128.21
	218.838	8941.48
SmoM2+PlxnA1R1dECD	243.992	6256.88
	254.054	7398.78

## Sheet: 3P
Treatment	Luciferase	Bgal
	20.123	21940
pCIG	27.669	22464.4
	32.7	22629.7
	7.546	2178.36
PlxnA1dECD	7.546	2508.28
	10.062	2568.4
	8112.11	11113
Gli1	8056.78	13849.4
	7810.27	15650.2
	7010.38	3753.54
Gli1+PlxnA1dECD	6917.31	3463.04
	5961.46	3277.51
	6389.08	5931.32
Gli1+PlxnA1R1dECD	6366.44	7033.94
	5999.19	6874.24
