# Supplementary material for: Plexins promote Hedgehog signaling through their cytoplasmic GAP activity
Source: eLife. 2022 Sep 28;11:e74750. doi: 10.7554/eLife.74750 (PMC9553217; doi:10.7554/eLife.74750)
Supplement: Figure 4—figure supplement 1—source data 1. [file elife-74750-fig4-figsupp1-data1.xlsx]

## Sheet: E,G
pCIG-HH	Ciliary Length (um)		Ciliation rate	pCIG+HH	Ciliary Length (um)		Ciliation Rate	Plexina1-HH	Ciliary Length (um)		Ciliation Rate	Plexina1+HH		Ciliary Length (um)		Ciliation Rate
	1.05122		116/139		0.85439		141/149 cil		0.94		82/99			1.00195		136/140
	0.858537		0.834532		0.905122		0.946309		0.912195		0.921348			1.02195		0.971429
	0.951463				0.990488				0.916341					0.786341
	0.999756				0.958293				0.536098					1.27024
	0.370488				1.10756				0.593659					0.781951
	0.302927				1.59488				0.807317					0.805122
	0.809268				0.964634				0.961951					0.790488
	0.506585				1.01805				0.166341					0.330976
	1.18707				0.853902				0.74122					0.568293
	1.00512				0.970244				0.980732					0.853659
	1.29854				0.767073				1.19756					0.849024
	0.964146				0.870732				0.615366					1.12561
	1.04171				0.927561				0.370976					0.967805
	0.933902				1.10415				1.01098					0.483415
	0.672683				0.553659				0.827317					0.853902
	0.582439				0.698537				0.875122					0.671951
	0.0558537				0.777073				1.25659					0.970244
	1.03439				0.983171				1.09634					0.729756
	0.981707				0.841951				0.777805					1.10707
	0.176829				1.03902				0.653415					0.964146
	0.815122				1.09878				0.766341					0.67439
	1.45415				0.716585				0.778537					0.640732
	1.14146				0.824878				1.18317					0.964878
	0.20561				0.852439				1.06415					0.800976
	1.21683				0.876341				0.460732					1.17488
	1.47683				1.02854				0.586341					0.941707
	0.473171				0.68439				0.754878					0.816585
	0.719024				1.01512				0.697073					0.469024
	0.606585				0.397073				0.591707					0.833415
	1.05415				0.95				0.771463					0.87561
	1.1761				0.479268				0.306341					0.98878
	0.837073				0.890732				0.404878					0.788293
	0.929268				0.545854				0.499512					1.15293
	0.265366				0.896439				0.541463					1.10171
	0.586341				0.906098				0.463415					0.42561
	0.916585				0.815122				0.696098					0.783415
	0.682439				0.80122				1.19439					0.877561
	0.962195				0.696341				0.764146					1.24268
	0.889756				0.609024				0.397561					0.963171
	0.629024				0.802195				0.862927					1.13659
	1.19805				0.49				0.370488					0.610244
	0.938537				0.643415				0.505366					0.846098
	0.95561				0.984146				0.606585					1.20293
	0.683171				0.533171				0.320732					0.919512
	1.05049				0.93				0.754146					1.01244
	1.27512				0.446585				0.223171					0.653171
	1.21659				0.966829				0.846098					0.96439
	0.908537				0.731463				0.552195					0.997073
	0.950488				0.822195				0.47122					0.742927
	0.897561				0.746585				0.944634					0.677561
	0.299756				0.882683				0.185854					0.662927
	0.990244				0.693659				0.772439					0.709512
	0.360976				0.853415				0.562439					0.889756
	0.166585				0.847561				0.810244					0.857073
	0.523902				1.05683				0.818537					0.279024
	0.676585				1.4961				0.922683					0.233659
	0.575122				0.567805				0.686829					0.69122
	0.68				0.859512				0.886829					0.167317
	0.716341				1.1178				0.880488					0.50561
	0.410732				1.15488				0.823415					0.344634
	0.0826829				0.746585				0.570976					0.464146
	0.0556098				0.752195				0.847805					0.610244
	0.642195				0.0790244				0.20561					0.53878
	0.493659				1.06659				0.312683					0.354146
	0.528537				0.773415				0.65122					0.265854
	0.468293				0.646829				0.781707					0.773171
	0.804878				0.585122				0.297561					0.125854
	0.232439				0.80122				0.305122					0.697317
	0.789512				0.88122				0.73					0.446585
	0.870732				0.95878				0.908049					0.482439
	0.303659				0.99439				0.819268					0.644146
	0.811707				1.46927				0.832927					0.490244
	0.912927				0.836098				0.813902					0.547317
	0.924146				0.643659				1.10854					1.06756
	0.805122				0.454634				0.808537					1.00951
	0.745366				0.999756				1.00171					1.09439
	0.952927				0.855854				0.675122					0.589024
	0.440244				1.33512				1.01463					0.780488
	0.673659				0.917073				1.12829					0.286098
	0.874634				0.962195				1.18439					0.397805
	0.57561				0.637561				1.22024					0.515366
	0.527317				0.823902				1.07415					0.463415
	0.393415				0.917073									0.827317
	0.731707				0.844634									0.555854
	0.53439				0.758293									0.703659
	0.89439				0.658537									0.606829
	0.503659				1.04098									0.726829
	0.503659				0.738049									0.790244
	0.0556098				0.983415									0.718537
	0.651463				0.997317									0.684634
	0.0785366				0.876098									0.857561
	0.75122				0.469512									0.969756
	0.719512				0.668293									0.334878
	0.610488				0.774878									0.845366
	0.667073				1.07854									0.45122
	0.555366				0.547561									0.506829
	0.277805				0.566585									0.480732
	0.233171				0.654146									0.537561
	0.805122				0.679512									0.695854
	0.124146				0.223171									0.804634
	0.937805				0.413659									0.97439
	0.541463				0.456829									0.433902
	0.93122				0.952927									0.74878
	1.32976				0.74439									0.763415
	0.958537				0.416585									0.616829
	0.602195				0.936341									0.907073
	0.504878				0.130244									0.292683
	1.09171				0.650976									0.822195
	0.989268				0.79122									0.696098
	0.974878				0.753902									0.86
	1.07				0.55878									0.792683
	1.10537				0.551951									1.13512
	0.292683				0.404146									0.662683
	0.943659				0.567805									0.803902
	0.703902				0.793171									1.07415
	0.960976				0.558049									0.579756
	0.986585				0.848293									0.798293
					0.317073									0.976829
	0.733569				0.223171									1.00049
					0.233659									0.736585
					0.580976									0.829512
					0.420488									0.899756
					0.344634									0.764634
					0.736098									0.765854
					0.572927									0.899024
					0.466585									1.03244
					0.876341									0.932195
					0.567317									0.675366
					0.463902									0.947073
					0.48439									0.66
					0.878537									0.790488
					0.139024									0.38
					0.36878
					0.497805									0.746578
					0.861463
					0.360244
					0.476829
					0.992927
					0.892927
					0.550244
					0.60561
					0.75624

## Sheet: F
pCIG+HH	Smoothened Intensity	Background Intensity	Signal-Background	Plxna1+HH	Smoothened Intensity	Background Intensity	Signal-Background	pCIG-HH	Smoothened Intensity	Background Intensity	Signal-Background	Plxna1-HH	Smoothened Intensity	Background Intensity	Signal-Background
	1400.8	1223.04	177.764		876.724	637.227	239.497		403.826	252.313	151.513		310.445	238.135	72.31
	388.567	209.913	178.654		750.169	444.331	305.838		1192.86	1288.94	-96.083		361.601	214.573	147.028
	540.203	233.371	306.832		592.406	275.259	317.147		270.306	407.352	-137.046		282.589	167.187	115.402
	586.909	224.05	362.859		592.773	250.388	342.385		305.929	265.484	40.445		347.359	251.383	95.976
	1580.03	1047.05	532.978		633.824	282.275	351.549		316.299	244.587	71.712		412.182	345.946	66.236
	548.843	425.062	123.781		381.708	224.155	157.553		466.463	345.699	120.764		401.081	451.766	-50.685
	354.638	224.626	130.012		737.811	458.416	279.395		500.219	505.145	-4.926		405.113	409.721	-4.608
	368.984	183.366	185.618		937.357	616.545	320.812		336.47	311.788	24.682		306.989	158.233	148.756
	867.247	938.3	-71.053		592.825	375.686	217.139		447.848	284.669	163.179		424.382	333.641	90.741
	318.456	225.359	93.097		539.784	250.545	289.239		372.663	311.218	61.445		528.946	406.684	122.262
	1079.99	1104.75	-24.767		1911.89	1746.74	165.145		388.633	291.617	97.016		379.142	268.609	110.533
	302.172	184.466	117.706		830.437	402.6	427.837		306.343	278.447	27.896		441.189	380.451	60.738
	354.899	324.268	30.631		561.933	366.942	194.991		333.929	310.543	23.386		428.623	401.657	26.966
	1630.71	1397.34	233.371		632.2	486.219	145.981		632.857	606.62	26.237		380.713	377.676	3.037
	331.442	171.795	159.647		536.433	217.139	319.294		322.107	239.091	83.016		366.995	320.132	46.863
	617.068	318.247	298.821		807.346	663.564	143.782		307.847	285.81	22.037		663.46	465.746	197.714
	1282.62	683.042	599.58		765.353	555.126	210.227		291.358	238.987	52.371		508.577	429.356	79.221
	768.181	301.753	466.428		853.738	487.319	366.419		399.833	410.515	-10.682		1028.31	1038.46	-10.158
	735.455	508.106	227.349		843.37	447.892	395.478		338.129	298.151	39.978		297.826	311.911	-14.085
	943.379	785.25	158.129		1583.22	1265.55	317.671		418.293	275.025	143.268		362.282	345.003	17.279
	2200.76	1962.31	238.449		1616.47	1237.75	378.724		360.788	230.639	130.149		668.172	486.638	181.534
	753.101	446.373	306.728		2115.78	1646.89	468.888		431.463	386.196	45.267		260.703	250.074	10.629
	1141.56	1390.33	-248.765		1102.71	1065.74	36.967		320.344	293.225	27.119		364.9	284.317	80.583
	679.639	311.859	367.78		576.751	352.91	223.841		401.7	366.129	35.571		900.234	691.001	209.233
	682.466	371.079	311.387		1063.23	1076.64	-13.404		323.092	219.802	103.29		350.71	530.412	-179.702
	722.575	396.892	325.683		826.72	553.136	273.584		325.84	217.987	107.853		458.992	335.107	123.885
	446.007	265.415	180.592		843.004	655.501	187.503		304.58	187.031	117.549		662.884	620.053	42.831
	888.767	410.401	478.366		718.752	549.68	169.072		516.222	422.811	93.411		519.678	425.324	94.354
	448.782	473.653	-24.871		689.378	627.226	62.152		364.848	293.742	71.106		443.86	419.198	24.662
	613.665	189.597	424.068		726.083	407.207	318.876		304.686	280.547	24.139		562.194	587.851	-25.657
	638.274	271.384	366.89		838.658	610.837	227.821		310.498	319.032	-8.534		662.255	614.136	48.119
	471.977	301.911	170.066		597.328	423.387	173.941						265.468	191.325	74.143
	441.608	110.271	331.337		571.41	422.497	148.913				53.1332		288.925	219.39	69.535
	332.332	252.692	79.64		712.678	391.761	320.917						696.133	701.787	-5.654
	383.174	125.508	257.666		485.015	377.676	107.339
	623.194	268.243	354.951		454.908	322.593	132.315								60.883
	702.887	346.417	356.47		490.565	245.832	244.733
	925.943	392.128	533.815		315.524	245.675	69.849
	588.532	296.57	291.962		350.92	210.803	140.117
	387.049	142.787	244.262
	456.322	353.904	102.418				235.372
			237.471

## Sheet: H,I
A2+/- Slide 1	Rate	A2+/- Slide 2	Rate	A2+/- Slide 3	Rate	A2+/- Slide 4	Rate	Overall Rate	A2-/- Slide 1	Rate	A2-/- Slide 2	Rate	A2-/- Slide 3	Rate	A2-/- Slide 4	Rate	Overall Rate
0.104	61	0.466	68	0.544	55	0.828	79	263	0.258	77	0.286	41	0.338	66	0.598	63	247
0.362	417	0.078	708	0.336	277	0.674	607	2009	0.156	556	0.104	304	0.312	648	0.468	608	2116
0.208	0.146283	0.13	0.0960452	0.518	0.198556	0.492	0.130148	0.130911	0.258	0.138489	0.208	0.134868	0.416	0.101852	0.416	0.103618	0.11673
0.31		0.362		0.466		0.208			0.414		0.338		0.312		0.364
0.388		0.208		0.622		0.336			0.31		0.104		0.312		0.364
0.362		0.492		0.518		0.57			0.284		0.26		0.39		0.156
0.258		0.156		0.622		0.466			0.362		0.156		0.312		0.364
0.414		0.31		0.284		0.518			0.57		0.078		0.312		0.442
0.466		0.31		0.622		0.44			0.336		0.078		0.208		0.494
0.208		0.31		0.544		0.492			0.104		0.312		0.364		0.312
0.414		0.31		0.44		0.492			0.156		0.208		0.312		0.52
0.362		0.31		0.388		0.258			0.258		0.208		0.364		0.26
0.208		0.284		0.182		0.208			0.208		0.26		0.936		0.156
0.104		0.284		0.414		0.414			0.208		0.572		0.312		0.468
0.258		0.388		0.492		0.544			0.466		0.416		0.156		0.364
0.258		0.208		0.466		0.674			0.104		0.572		0.312		0.26
0.156		0.31		0.362		0.518			0.284		0.312		0.208		0.156
0.208		0.078		0.104		0.31			0.414		0.312		0.26		0.338
0.31		0.544		0.492		0.674			0.388		0.286		0.208		0.468
0.258		0.362		1.088		0.518			0.284		0.26		0.156		0.39
0.156		0.362		0.362		0.674			0.596		0.26		0.208		0.156
0.258		0.284		0.362		0.414			0.31		0.208		0.26		0.442
0.336		0.234		0.284		0.596			0.156		0.286		0.156		0.312
0.156		0.492		0.622		0.7			0.234		0.312		0.104		0.234
0.208		0.362		0.726		0.622			0.31		0.442		0.208		0.156
0.078		0.258		0.362		0.31			0.258		0.312		0.312		0.182
0.156		0.414		0.674		0.648			0.362		0.286		0.364		0.312
0.31		0.208		0.518		0.7			0.466		0.286		0.208		0.468
0.336		0.258		0.414		0.362			0.31		0.546		0.26		0.494
0.44		0.284		1.14		0.362			0.284		0.338		0.26		0.182
0.362		0.284		0.414		0.674			0.258		0.156		0.416		0.416
0.104		0.156		0.258		0.284			0.596		0.338		0.208		0.468
0.414		0.31		0.518		0.234			0.336		0.52		0.208		0.312
0.208		0.414		0.726		0.336			0.414		0.312		0.39		0.364
0.078		0.336		0.622		0.674			0.284		0.312		0.338		0.26
0.208		0.258		0.258		0.57			0.414		0.52		0.26		0.494
0.156		0.544		0.726		0.336			0.258		0.312		0.208		0.78
0.258		0.156		0.88		0.208			0.104		0.208		0.312		0.52
0.258		0.156		0.466		0.284			0.208		0.26		0.104		0.312
0.208		0.388		0.388		0.414			0.362		0.208		0.156		0.468
0.208		0.336		0.622		0.414			0.208		0.182		0.598		0.312
0.362		0.258		0.622		0.388			0.362				0.104		0.702
0.078		0.362		0.208		0.414			0.518				0.156		0.416
0.234		0.078		0.414		0.156			0.208				0.364		0.364
0.362		0.258		0.362		0.156			0.31				0.312		0.468
0.388		0.208		0.57		0.544			0.31				0.442		0.52
0.078		0.31		0.57		0.182			0.57				0.26		0.312
0.31		0.31		0.622		0.414			0.284				0.416		0.364
0.208		0.234		0.57		0.388			0.208				0.104		0.364
0.208		0.078		0.466		0.104			0.284				0.416		0.52
0.078		0.13		0.388		0.156			0.156				0.624		0.468
0.466		0.104		0.31		0.156			0.182				0.26		0.546
0.104		0.156		0.31		0.156			0.258				0.338		0.52
0.208		0.258		0.7		0.104			0.31				0.156		0.39
0.544		0.182		0.726		0.362			0.156				0.494		0.52
0.336		0.104				0.518			0.156				0.156		0.364
0.156		0.258				0.362			0.828				0.156		0.156
0.078		0.208				0.776			0.57				0.26		0.39
0.31		0.362				0.31			0.388				0.078		0.52
0.258		0.414				0.362			0.362				0.208		0.338
0.156		0.31				0.362			0.57				0.65		0.416
		0.362				0.362			0.518				0.234		0.312
		0.234				0.208			0.622				0.364		0.494
		0.414				0.466			0.208				0.312
		0.57				0.414			0.234				0.156
		0.362				0.414			0.414				0.312
		0.258				0.258			0.336
		0.362				0.388			0.622
						0.31			0.208
						0.648			0.156
						0.518			0.544
						0.726			0.156
						0.362			0.258
						0.234			0.156
						0.258			0.362
						0.674			0.258
						0.362			0.31
						0.518
						0.44
