# Supplementary material for: Plexins promote Hedgehog signaling through their cytoplasmic GAP activity
Source: eLife. 2022 Sep 28;11:e74750. doi: 10.7554/eLife.74750 (PMC9553217; doi:10.7554/eLife.74750)
Supplement: Figure 4—source data 1. [file elife-74750-fig4-data1.xlsx]

## Sheet: 4O
Treatment	Luciferase	Bgal
	107.88	172261
3A-/- pCIG	113.017	177648
	102.743	186018
	35.96	178452
3A-/- SmoM2	25.686	179838
	43.666	178478
	25.686	178419
3A-/- SmoM2+PlxnA1dECD	7.706	188725
	10.274	186934
	25.686	195237
3A-/- SmoM2+PlxnA1R1dECD	5.137	213116
	33.391	189804
	118.154	37084.7
WT pCIG	107.88	43390
	100.174	46537.3
	261.994	12235.7
WT SmoM2	231.171	11779.2
	244.014	13231.7
	308.228	2817.99
WT SmoM2+PlxnA1dECD	251.719	3099.62
	315.933	3150.17
	326.208	9667.71
WT SmoM2+PlxnA1R1dECD	277.405	8025.97
	282.542	9647.24

## Sheet: 4P
Treatment	Luciferase	Bgal
	95.037	186697
pCIG	105.311	182798
	79.625	185663
	11106.5	181082
Gli1	8070.43	179461
	7466.82	182141
	7674.87	187991
Gli2dN	6814.4	165853
	9298.2	172147
	30.823	183010
PlxnA1dECD	46.234	182271
	41.097	181756
	5558.37	186457
Gli1+PlxnA1dECD	7019.89	170712
	8245.09	164740
	13356.5	176737
Gli1+PlxnA1R1dECD	12639.9	169693
	10084.2	170932
	6087.5	184294
Gli2dN+PlxnA1dECD	7628.64	168979
	5542.96	160782
	10662.1	171528
Gli2dN+PlxnA1R1dECD	8124.37	161372
	7279.31	164019
