# Supplementary material for: Plexins promote Hedgehog signaling through their cytoplasmic GAP activity
Source: eLife. 2022 Sep 28;11:e74750. doi: 10.7554/eLife.74750 (PMC9553217; doi:10.7554/eLife.74750)
Supplement: Figure 5—figure supplement 1—source data 1. [file elife-74750-fig5-figsupp1-data1.xlsx]

## Sheet: M
pCIG				Gli1				PlxnA1dECD
Electroporated	Unelectroporated	Ratio		Electroporated	Unelectroporated	Ratio		Electroporated	Unelectroporated	Ratio
5.34	4.95	1.07879		6.09	5.33	1.14259		8.22	9.2	0.893478
5.15	5.15	1		6.54	3.72	1.75806		13.1	11.68	1.12158
5.15	4.95	1.0404		6.26	4.61	1.35792		12.09	11.77	1.02719
5.15	4.95	1.0404		10	4.7	2.12766		10.2	9.91	1.02926
5.15	5.15	1		9.3	5.93	1.5683		13.21	11.54	1.14471
4.63	4.47	1.03579		6.57	5.62	1.16904		11.3	12.58	0.898251
								13.65	12.32	1.10795
		1.03257				1.52059		10.26	10.12	1.01383
								12.65	12.27	1.03097
								12	10.95	1.09589
								11.27	10.89	1.03489
								11.46	11.1	1.03243
								12.2	12.81	0.952381
								12.2	11.62	1.04991
								13.51	13.09	1.03209
								12.56	13.05	0.962452
								12.58	11.62	1.08262
										1.02999
