# Supplementary material for: Plexins promote Hedgehog signaling through their cytoplasmic GAP activity
Source: eLife. 2022 Sep 28;11:e74750. doi: 10.7554/eLife.74750 (PMC9553217; doi:10.7554/eLife.74750)
Supplement: Figure 7—figure supplement 1—source data 1. [file elife-74750-fig7-figsupp1-data1.xlsx]

## Sheet: C
Plxna1 +/-	Plxna1 -/-
89.25	87.5
84	98.75
105.25	90.5

## Sheet: F
Plxna1 +/-	Plxna1 -/-
34	40.5
33.5	29.75
34.5	30.5

## Sheet: I
Plxna2 +/-	Plxna2 -/-
85.5	78.25
67.75	74.75
88.25	65.25
70.25	77.25
68.25	70.75

## Sheet: L
Plxna2 +/-	Plxna2 -/-
38	31.25
34.5	35.5
37	28.5
27	34.5
34.25	27.5
