# Supplementary material for: Plexins promote Hedgehog signaling through their cytoplasmic GAP activity
Source: eLife. 2022 Sep 28;11:e74750. doi: 10.7554/eLife.74750 (PMC9553217; doi:10.7554/eLife.74750)
Supplement: Figure 7—figure supplement 2—source data 1. [file elife-74750-fig7-figsupp2-data1.xlsx]

## Sheet: C
Plxna1 +/-	Plxna1 -/-
2.25	1
0.5	2
1.5	1.25
1.75

## Sheet: F
Plxna1 +/-	Plxna1 -/-
1.5	0
0.5	0.5
1	1.5
0

## Sheet: I
Plxna2 +/-	Plxna2 -/-
0.5	0.75
0.5	0.5
0	0
0.25	0.25

## Sheet: L
Plxna2 +/-	Plxna2 -/-
1	1.5
0.25	0.25
0	0
0	0
