# Supplementary material for: Plexins promote Hedgehog signaling through their cytoplasmic GAP activity
Source: eLife. 2022 Sep 28;11:e74750. doi: 10.7554/eLife.74750 (PMC9553217; doi:10.7554/eLife.74750)
Supplement: Figure 7—source data 1. [file elife-74750-fig7-data1.xlsx]

## Sheet: 6C
number of lacZ positive cells		section at 16 micron onto 3 slides
	a1+/-;Gli1-lacZ/+								a1-/-;Gli1-lacZ/+
	No.2-3	No.3-1	No.3-6	No.1-5					No.2-1	No.2-7	No.3-2	No.3-5	No.3-7
Dorsal DG	192	125	121	123					91	91	50	70	68
	98	128	124	110					100	49	86	72	61
	127	101	111	84					134	49	98	64	66
	185	90	88	125					125	49	93	88	89
	118	95	61	127					127	78	78	66	99
	109	94	91	93					116	46	72	72	81
	74	86	93						84	41	62	76	83
	70	88	77						88	47	82	66	57
ave	121.625	100.875	95.75	110.333					108.125	56.25	77.625	71.75	75.5

## Sheet: 6F
	a1+/-;Gli1-lacZ/+								a1-/-;Gli1-lacZ/+
ventral hip	25	20	30	22					27	17	22	10	10
	18	18	26	15					22	12	11	9	12
	13	23	21	18					21	11	10	15	15
	28	17	16	17					14	5	16	15	14
	18	26	26	12					13	10	14	20	13
	9	12	11	15					9	20	24	14	7
	23	25	28						14	18	13	15	10
	18	16	11						26	22	26	22	18
ave	19	19.625	21.125	16.5					18.25	14.375	17	15	12.375

## Sheet: 6I
number of lacZ positive cells
	a2+/-;Gli1-lacZ/+								a2-/-;Gli1-lacZ/+
	No.8	No.9	No.11	No.12	No.14	No.5	No.6		No.10	No.18	No.-3	No.-4	No.-5
Dorsal DG	196	54	137	85	110	111	113		90	68	56	77	81
	161	109	80	111	82	95	105		60	97	66	74	70
	118	71	130	84	92	110	96		77	54	53	80	83
	115	93	166	89	86	103	89		45	60	55	78	87
	65	94	89	69	60	96	90		37	28	46	78	53
	30		85	53	85	97	66		46	16	56	73
												68
ave	114.167	84.2	114.5	81.8333	85.8333	102	93.1667		59.1667	53.8333	55.3333	75.4286	74.8

## Sheet: 6L
	a2+/-;Gli1-lacZ/+								a2-/-;Gli1-lacZ/+
ventral hip	48	28	52	29	30	35	33		33	10	4	14	18
	41		35	23	36	35	23		24	26	8	22	23
	29			25	46	33	27		15		5	10	5
					49				15		17	8
											18
ave	39.3333	28	43.5	25.6667	40.25	34.3333	27.6667		21.75	18	10.4	13.5	15.3333
