# Supplementary material for: Plexins promote Hedgehog signaling through their cytoplasmic GAP activity
Source: eLife journal article supplement (doi:10.7554/elife.74750), 2022-09-28
Supplement: transrepform1 [file elife-74750-transrepform1-v2.pdf]

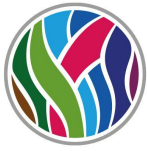

## eLife's transparent reporting form

We encourage authors to provide detailed information *within their submission* to facilitate the interpretation and replication of experiments. Authors can upload supporting documentation to indicate the use of appropriate reporting guidelines for health-related research (see [EQUATOR Network](#)), life science research (see the [BioSharing Information Resource](#)), or the [ARRIVE guidelines](#) for reporting work involving animal research. Where applicable, authors should refer to any relevant reporting standards documents in this form.

If you have any questions, please consult our Journal Policies and/or contact us: [editorial@elifesciences.org](mailto:editorial@elifesciences.org).

### Sample-size estimation

- You should state whether an appropriate sample size was computed when the study was being designed
- You should state the statistical method of sample size computation and any required assumptions
- If no explicit power analysis was used, you should describe how you decided what sample (replicate) size (number) to use

Please outline where this information can be found within the submission (e.g., sections or figure legends), or explain why this information doesn't apply to your submission:

Cell signaling assays: Materials and Methods, Lines 508-514.  
Chicken in ovo electroporations: Materials and Methods, Lines 619-622.  
Mouse Dentate Gyrus Analysis: Materials and Methods, Lines 643-644, 650-652.  
Cilia Analysis: Materials and Methods, Lines 540-549.

### Replicates

- You should report how often each experiment was performed
- You should include a definition of biological versus technical replication
- The data obtained should be provided and sufficient information should be provided to indicate the number of independent biological and/or technical replicates
- If you encountered any outliers, you should describe how these were handled
- Criteria for exclusion/inclusion of data should be clearly stated
- High-throughput sequence data should be uploaded before submission, with a private link for reviewers provided (these are available from both GEO and ArrayExpress)

Please outline where this information can be found within the submission (e.g., sections or figure legends), or explain why this information doesn't apply to your submission:

Cell signaling assays: Materials and Methods, Lines 508-514; Figure 3- figure supplement 1 (summary of biological replicates for PlxnA1- and PlxnA1ΔECD-mediated HH pathway promotion)  
Chicken in ovo electroporations: Materials and Methods, Lines 619-622; Figure Legend (Figure 5), Lines 811-821; Figure Legend (Figure 6) Lines 840-849.  
Mouse Dentate Gyrus Analysis: Materials and Methods, Lines 643-644, 650-652. Figure Legend (Figure 7), Lines 851-857. Figure Legend (Figure 7- figure supplement 1), Lines 861-867. Figure Legend (Figure 7- figure supplement 2) Lines 871-877.



Cilia Analysis: Materials and Methods, Lines 540-549. Figure Legend (Figure 4- figure supplement 1), Lines 793-807.

### Statistical reporting

- Statistical analysis methods should be described and justified
- Raw data should be presented in figures whenever informative to do so (typically when N per group is less than 10)
- For each experiment, you should identify the statistical tests used, exact values of N, definitions of center, methods of multiple test correction, and dispersion and precision measures (e.g., mean, median, SD, SEM, confidence intervals; and, for the major substantive results, a measure of effect size (e.g., Pearson's r, Cohen's d)
- Report exact p-values wherever possible alongside the summary statistics and 95% confidence intervals. These should be reported for all key questions and not only when the p-value is less than 0.05.

Please outline where this information can be found within the submission (e.g., sections or figure legends), or explain why this information doesn't apply to your submission:

Each figure legend indicates the type of statistical analysis used. Exact p-values are reported in the figures themselves. Individual data points are included in all figures.

(For large datasets, or papers with a very large number of statistical tests, you may upload a single table file with tests, Ns, etc., with reference to sections in the manuscript.)

### Group allocation

- Indicate how samples were allocated into experimental groups (in the case of clinical studies, please specify allocation to treatment method); if randomization was used, please also state if restricted randomization was applied
- Indicate if masking was used during group allocation, data collection and/or data analysis

Please outline where this information can be found within the submission (e.g., sections or figure legends), or explain why this information doesn't apply to your submission:

This information is not applicable to our submission.

### Additional data files ("source data")

- We encourage you to upload relevant additional data files, such as numerical data that are represented as a graph in a figure, or as a summary table
- Where provided, these should be in the most useful format, and they can be uploaded as "Source data" files linked to a main figure or table
- Include model definition files including the full list of parameters used
- Include code used for data analysis (e.g., R, MatLab)
- Avoid stating that data files are "available upon request"

Please indicate the figures or tables for which source data files have been provided:

Source data files have been provided for Figure 1B-I, Figure 2B-C, Figure 3B-D, O-P, Figure 4O-P, Figure 7C,F,I, L, Figure 3- figure supplement 1C, and Figure 3- figure supplement 2B-C, Figure 3- figure supplement 3B-C, Figure 4- figure supplement 1E-I, Figure 5- figure supplement 1M, Figure 7- figure supplement 1C,F,I,L, Figure 7- figure supplement 2C,F,I,L.
